# Supplementary material for: Conjugates of Chitosan and Calcium Alginate with Oligoproline and Oligohydroxyproline Derivatives for Potential Use in Regenerative Medicine
Source: PubMed Central journal article supplement (PMC7412561; doi:10.3390/ma13143079), 2020-07-10
Supplement: materials-13-03079-s001.pdf [file materials-13-03079-s001.pdf]

Supplementary Materials

## Conjugates of Chitosan and Calcium Alginate with Oligoproline and Oligohydroxyproline Derivatives for Potential Use in Regenerative Medicine

| <b>Model pep, 1</b> | 10 $\mu$ m | 100 $\mu$ m | 0.5 mM | 1 mM | 10 mM | K <sup>-</sup> | K <sup>+</sup> |
|---------------------|------------|-------------|--------|------|-------|----------------|----------------|
| 10 $\mu$ m          | -          | ns          | ns     | ns   | ns    | ns             | *              |
| 100 $\mu$ m         |            | -           | *      | *    | *     | ns             | *              |
| 0.5 mM              |            |             | -      | ns   | ns    | ns             | *              |
| 1 mM                |            |             |        | -    | ns    | *              | *              |
| 10 mM               |            |             |        |      | -     | *              | *              |
| K <sup>-</sup>      |            |             |        |      |       | -              | *              |
| K <sup>+</sup>      |            |             |        |      |       |                | -              |

  

| <b>(Pro)<sub>9</sub>, 3</b> | 10 $\mu$ m | 100 $\mu$ m | 0.5 mM | 1 mM | 10 mM | K <sup>-</sup> | K <sup>+</sup> |
|-----------------------------|------------|-------------|--------|------|-------|----------------|----------------|
| 10 $\mu$ m                  | -          | ns          | ns     | ns   | ns    | ns             | *              |
| 100 $\mu$ m                 |            | -           | ns     | ns   | ns    | ns             | *              |
| 0.5 mM                      |            |             | -      | ns   | ns    | ns             | *              |
| 1 mM                        |            |             |        | -    | ns    | ns             | *              |
| 10 mM                       |            |             |        |      | -     | ns             | *              |
| K <sup>-</sup>              |            |             |        |      |       | -              | *              |
| K <sup>+</sup>              |            |             |        |      |       |                | -              |

  

| <b>(Pro)<sub>6</sub>, 2</b> | 10 $\mu$ m | 100 $\mu$ m | 0.5 mM | 1 mM | 10 mM | K <sup>-</sup> | K <sup>+</sup> |
|-----------------------------|------------|-------------|--------|------|-------|----------------|----------------|
| 10 $\mu$ m                  | -          | ns          | ns     | ns   | ns    | ns             | *              |
| 100 $\mu$ m                 |            | -           | ns     | ns   | ns    | ns             | *              |
| 0.5 mM                      |            |             | -      | ns   | ns    | ns             | *              |
| 1 mM                        |            |             |        | -    | ns    | ns             | *              |
| 10 mM                       |            |             |        |      | -     | ns             | *              |
| K <sup>-</sup>              |            |             |        |      |       | -              | *              |
| K <sup>+</sup>              |            |             |        |      |       |                | -              |

  

| <b>(Hyp)<sub>9</sub>, 5</b> | 10 $\mu$ m | 100 $\mu$ m | 0.5 mM | 1 mM | 10 mM | K <sup>-</sup> | K <sup>+</sup> |
|-----------------------------|------------|-------------|--------|------|-------|----------------|----------------|
| 10 $\mu$ m                  | -          | ns          | ns     | ns   | ns    | ns             | *              |
| 100 $\mu$ m                 |            | -           | ns     | ns   | ns    | ns             | *              |
| 0.5 mM                      |            |             | -      | ns   | ns    | ns             | *              |
| 1 mM                        |            |             |        | -    | ns    | ns             | *              |
| 10 mM                       |            |             |        |      | -     | ns             | *              |
| K <sup>-</sup>              |            |             |        |      |       | -              | *              |
| K <sup>+</sup>              |            |             |        |      |       |                | -              |

**Figure S1.** Results of MTT test of the endothelial cell line EA.h 926 cultured in the presence of peptides 1–5 (1 day of incubation) – Statistical analysis. Statistical significance was assessed using one-way

ANOVA analysis of variance. Values for which the value  $**p < 0.001$ ,  $*p < 0.01$ ,  $p < 0.05$  were considered statistically significant.
